# Supplementary material
Source: publisher site journal article supplement (https://www.dovepress.com/get_supplementary_file.php?f=287534.docx)
Supplement: Supplementary file 1 [file get_supplementary_file.php]

**Supplementary material**

**A sample of data collection Tool**

**Part I: Socio -demographic characteristics of respondents**

| No | Questions | Responses |
| --- | --- | --- |
| 101 | Age | ________________________Years |
| 102 | Residency | 1. Urban 2. Rural |
| 103 | Religion | 1. Muslim 2. Orthodox 3. Protestant 4. Catholic 5. Other, specify________________________ |
| 104 | Ethnicity? | 1. Amhara 2. Oromo 3. Tigiray 4. Afar 5. Others,specify__________________ |
| 105 | Marital status | 1. Married 2. single 3. Widowed 4. Divorced 5. separated |
| 106 | Mother Occupation? | 1. Housewife 2. Merchant 3. Farmer 4. Government employee 5. Other, specify__________________ |
| 107 | Mother educational status? | 1. Can’t read and write 2. Read and write 3. Primary school 4. Secondary school 5. College and above |
| 108 | Family monthly income | _______________Birr |

**Part II: Questions related to factors associated with ANC utilization during COVID 19**

| 201 | Desire of pregnancy | 1. Planned 2. Un Planned |
| --- | --- | --- |
| 202 | Order of pregnancy | 1. First 2. Second 3. Third 4. Four and more |
| 203 | Number of living children | 1. 0 2. 1 3. 2-4 4. >=5 |
| 204 | Parity | 1. 0 2. 1 3. 2-4 4. >=5 |
| 205 | Did you have history of abortion? | 1. Yes 2. No |
| 206 | Did you have history of still birth? | 1. Yes 2. No |
| 207 | Number of ANC visit in the current pregnancy | 1. First 2. Second 3. Third 4. Fourth and more |
| 208 | Are you supplemented with iron during the current pregnancy? | 1. Yes 2. No |
| 209 | If the ans.for Q208 is Yes, for how long? | _____________ |
| 210 | Are you supplemented with Folic acid during the current pregnancy? | 1. Yes 2. No |
| 211 | Have you been vaccinated with TT during current pregnancy? | 1. Yes 2. No |
| 212 | If the ans.for Q211 is Yes, how many times did you took TT? | ___________ |
| 213 | Did you miss or late to start ANC visit during COVID-19 outbreak? | 1. Yes 2. No |
|  | Facility related factors | 1. deploying of maternal care workers 2. yes B. No 3. Interruption and diversion of maternity services to COVID 19 response 4. Yes B.no 5. Fear of COVID-19 infection 6. Yes B. no 7. Social distancing 8. Yes B. no |
| Socio cultural and economic factors | 5. Stay home principle  6. Transport inaccessibility  7. Loss of caregiver  9. health seeking behavior  10. Peer pressure  11. If any specify­­­­­­­­­­­­­­­­­_______________________ |
